# Supplementary material for: Cross-sectional study of chromosomal aberrations and immunologic factors in Iraqi couples with recurrent pregnancy loss
Source: PeerJ. 2022 Feb 7;10:e12801. doi: 10.7717/peerj.12801 (PMC8830330; doi:10.7717/peerj.12801)
Supplement: Supplemental Information 3 [file peerj-10-12801-s003.xlsx]

## Sheet: page1
Patient_no	Interleukin_6
D1	1
D2	1.3
D3	1.4
D4	1.1
D5	1
D6	1.5
D7	1.5
D8	2
D9	1
D10	1.8
D11	1.6
D12	1.5
D13	2
D14	1.8
D15	2
D16	2
D17	1.5
D18	1.5
D19	1.5
D20	2.1
D21	1.1
D22	1.2
D23	2
D24	2
D25	2.2
