# Supplementary material for: Cross-sectional study of chromosomal aberrations and immunologic factors in Iraqi couples with recurrent pregnancy loss
Source: PeerJ. 2022 Feb 7;10:e12801. doi: 10.7717/peerj.12801 (PMC8830330; doi:10.7717/peerj.12801)
Supplement: Supplemental Information 5 [file peerj-10-12801-s005.xlsx]

## Sheet: page1
Interleukin-6 group	Frequency	Percent
<= 1.5	14	56
1.6 - 1.9	3	12
2.0+	8	32
